# Supplementary material for: Exploring the Antioxidant and Anti-Inflammatory Potential of Wilckia maritima: In Vitro and In Silico Investigations
Source: MDPI journal article supplement (doi:10.3390/pr11051497), 2023-05-15
Supplement: s1 [file s1]

Article

# Exploring the Antioxidant and Anti-Inflammatory Potential of *Wilckia maritima*: *In vitro* and *Insilco* investigations

Mehreen Jabeen<sup>1</sup>, Muhammad Uzair<sup>1</sup>, Farhan Siddique<sup>1,2\*</sup>, Muhammad Shoaib Khan<sup>1</sup>, Muhammad Hanif<sup>3</sup>, Ahmad Mohammad Salamatullah<sup>4</sup>, Hiba-Allah Nafidi<sup>5</sup> and Mohammed Bourhia<sup>6</sup>

<sup>1</sup>Department of Pharmaceutical Chemistry, Faculty of Pharmacy, Bahauddin Zakariya University, 60800, Multan Pakistan

<sup>2</sup>Laboratory of Organic Electronics, Department of Science and Technology, Linköping University, SE-60174 Norrköping, Sweden

<sup>3</sup>Department of Pharmaceutics, Faculty of Pharmacy, Bahauddin Zakariya University, 60800, Multan Pakistan

<sup>4</sup>Department of Food Science & Nutrition, College of Food and Agricultural Sciences, King Saud University, 11 P.O. Box 2460, Riyadh 11451, Saudi Arabia

<sup>5</sup>Department of Food Science, Faculty of Agricultural and Food Sciences, Laval University, 2325 Quebec City, QC G1V 0A6, Canada

<sup>6</sup>Laboratory of Chemistry and Biochemistry, Faculty of Medicine and Pharmacy, Ibn Zohr University, Laayoune 70000, Morocco

\* Correspondence: drfarhansiddique@bzu.edu.pk (FS); bourhimoahmmmed@gmail.com (BM)

## Contents

|                                                                                                                                                                                                                                   |   |
|-----------------------------------------------------------------------------------------------------------------------------------------------------------------------------------------------------------------------------------|---|
| Table S1 Predicted binding energies via molecular docking. ....                                                                                                                                                                   | 2 |
| Figure S1 The putative 2D and 3D binding mode of all investigated compounds (A-G) using target protein 1R4U. Green dashes are indicating hydrogen bonding whereas red dashes are indicating hydrophobic interactions. ....        | 5 |
| Figure S2 The putative 2D and 3D binding mode of <i>all investigated compounds</i> (A-G) using target protein 3O8Y. Green dashes are indicating hydrogen bonding whereas red dashes are indicating hydrophobic interactions. .... | 8 |
| Figure S3 Thin layer chromatography results for studied compounds. ....                                                                                                                                                           | 8 |

Table S1 Predicted binding energies via molecular docking.

| Ligand | Docking score with 1R4U | Docking score with lipoxygenase protein (3O8Y) |
|--------|-------------------------|------------------------------------------------|
| A      | -6.88                   | -6.21                                          |
| B      | -6.18                   | -6.41                                          |
| C      | -3.82                   | -3.56                                          |
| D      | -6.52                   | -1.19                                          |
| E      | -3.49                   | -5.93                                          |
| F      | -4.39                   | -4.96                                          |
| G      | -4.04                   | -4.98                                          |

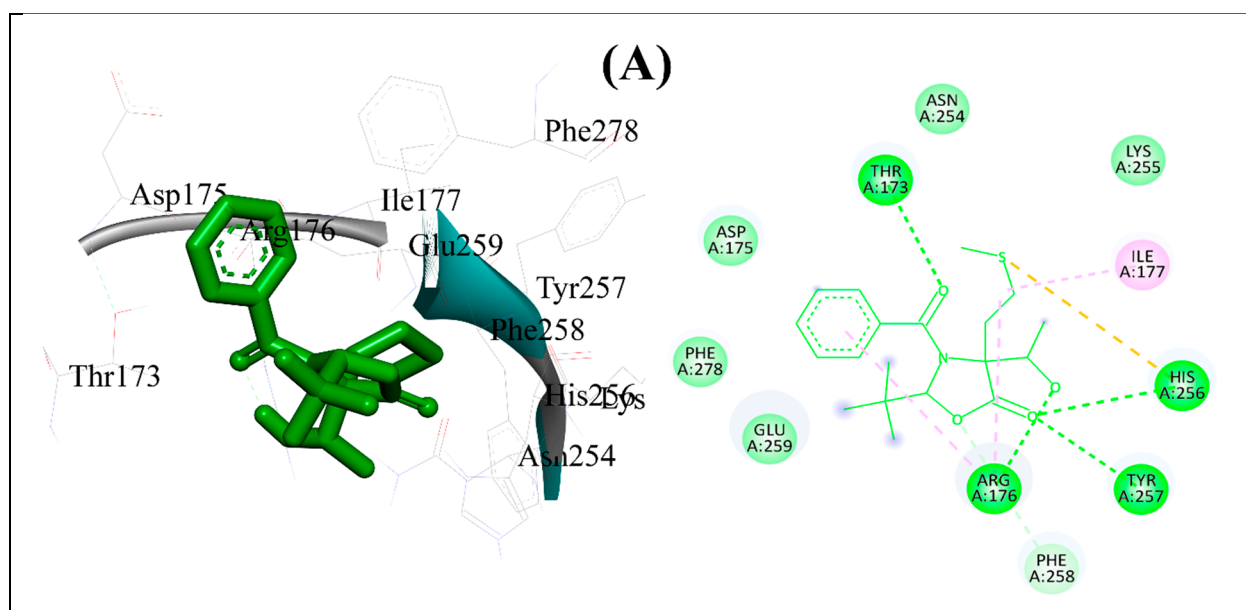

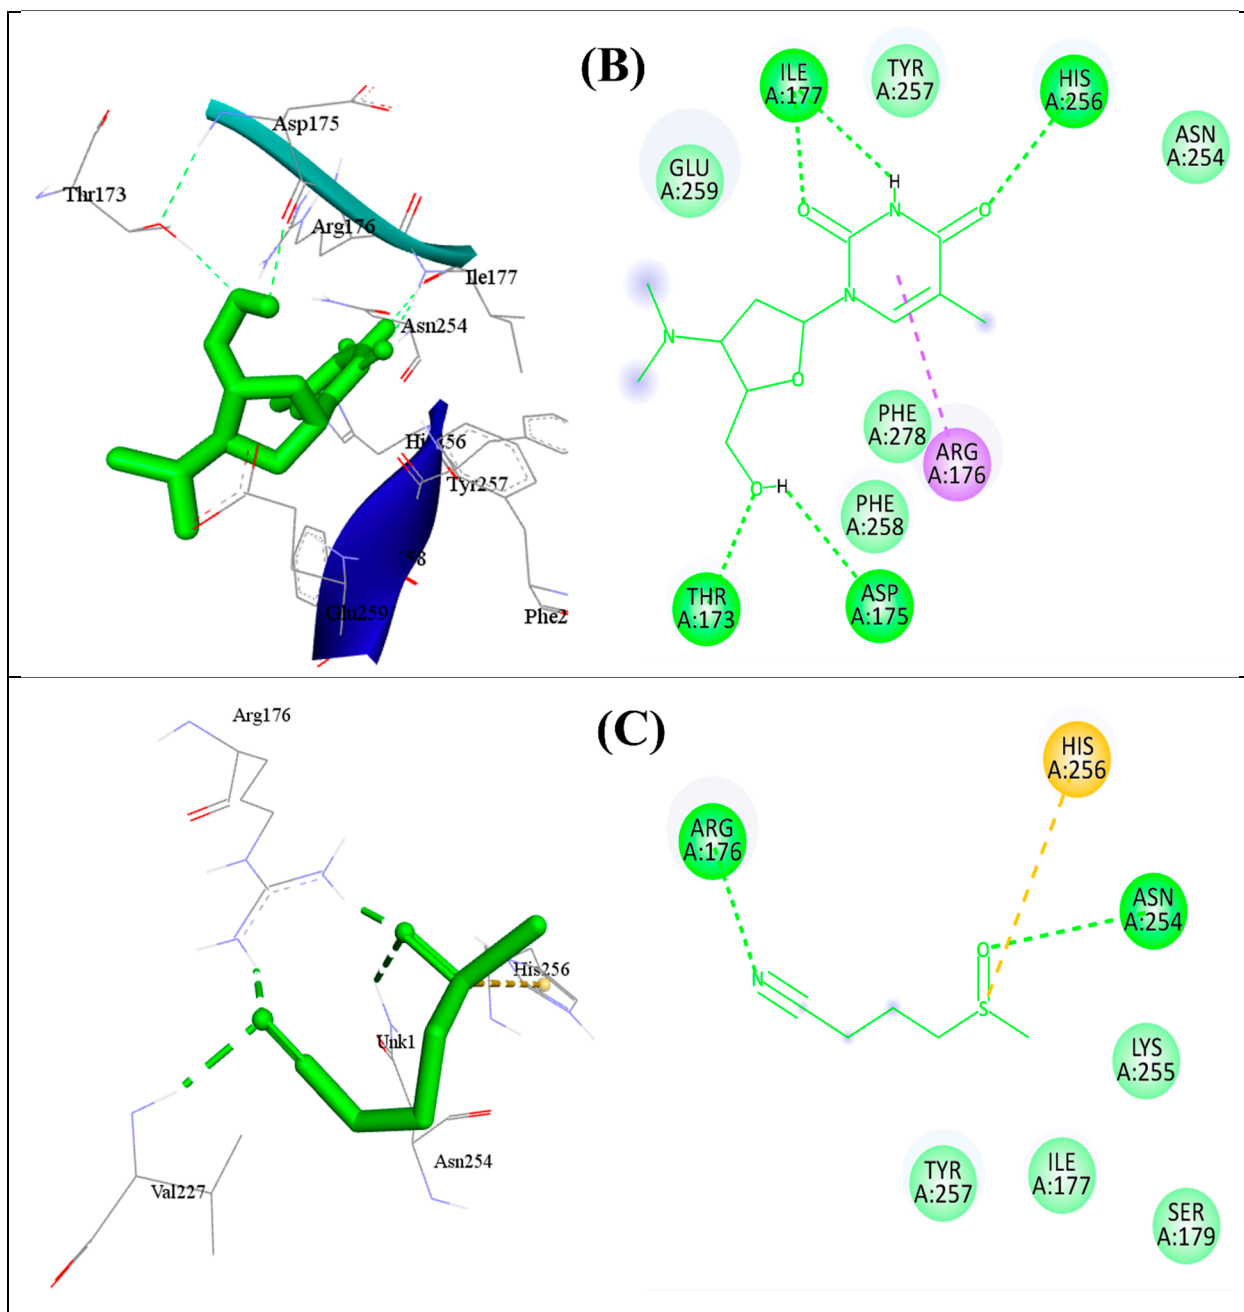

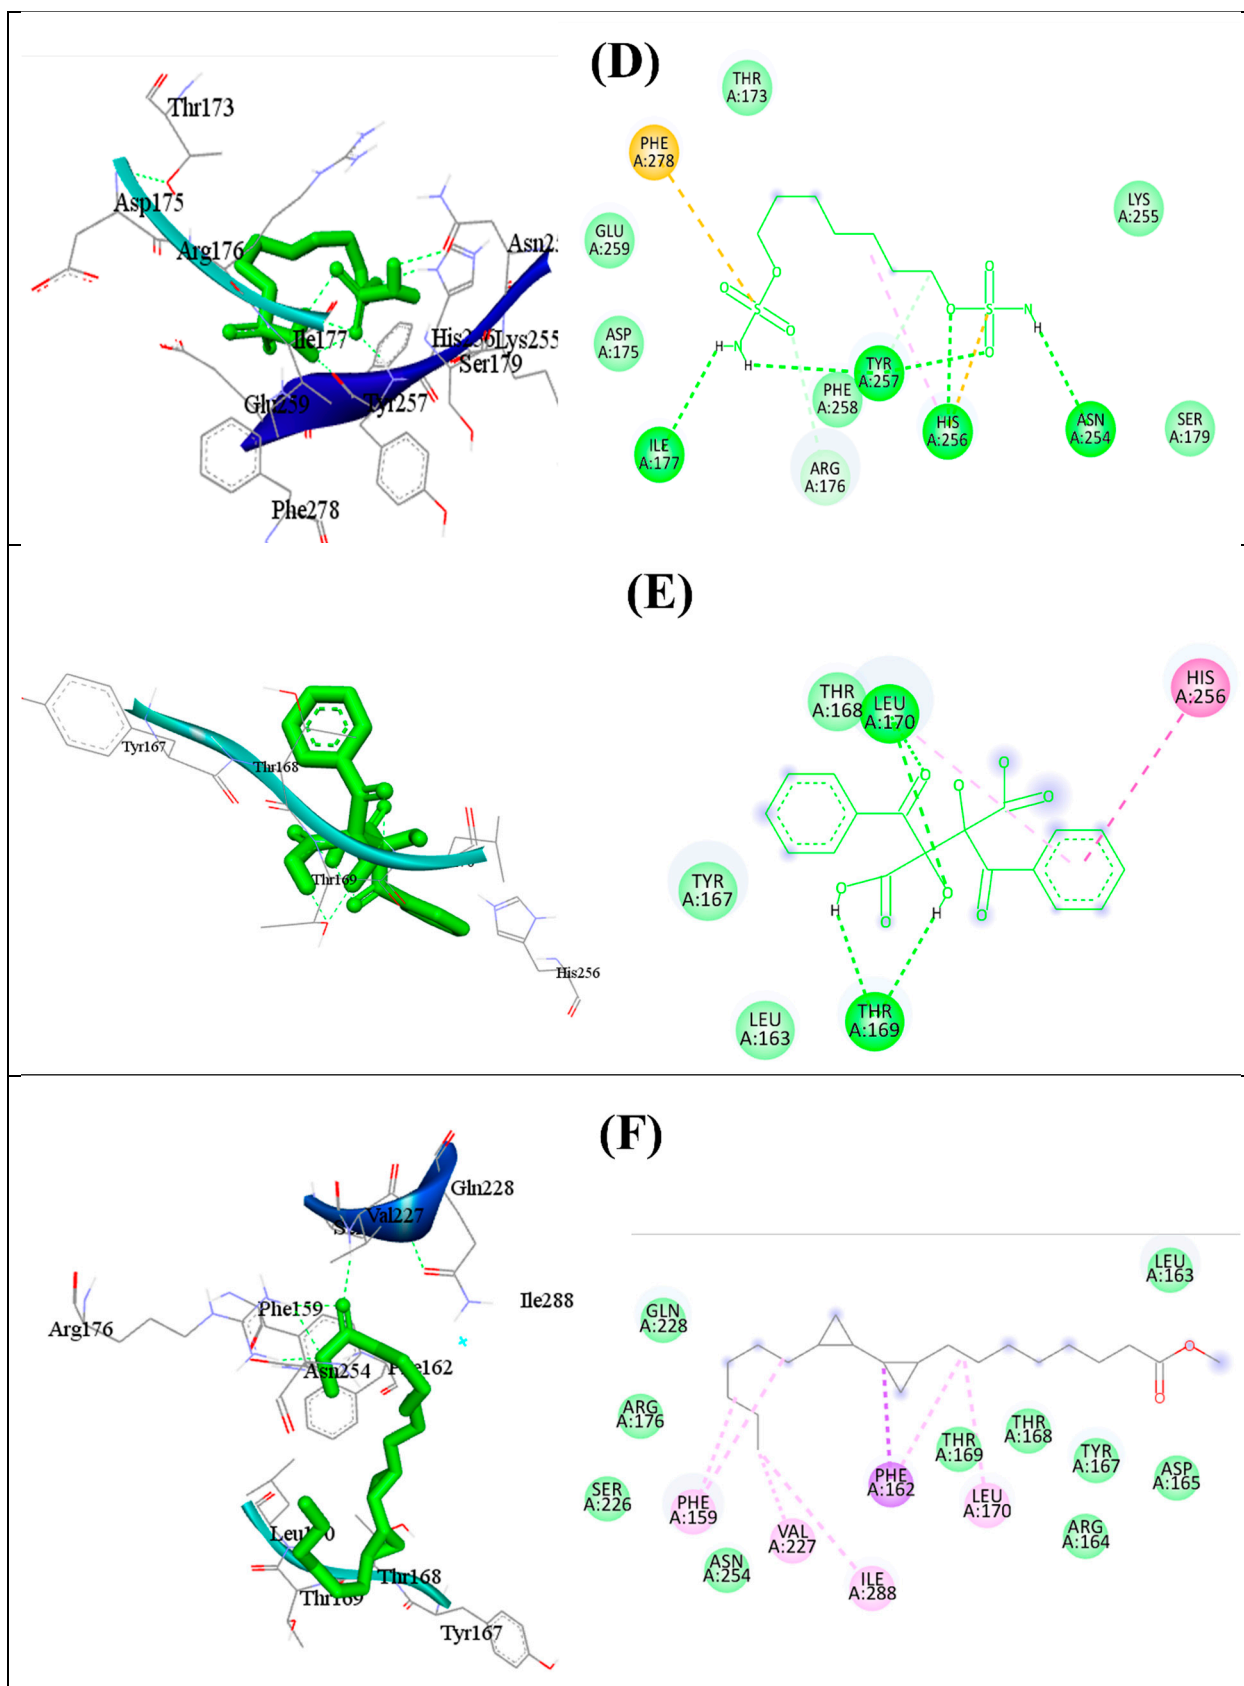

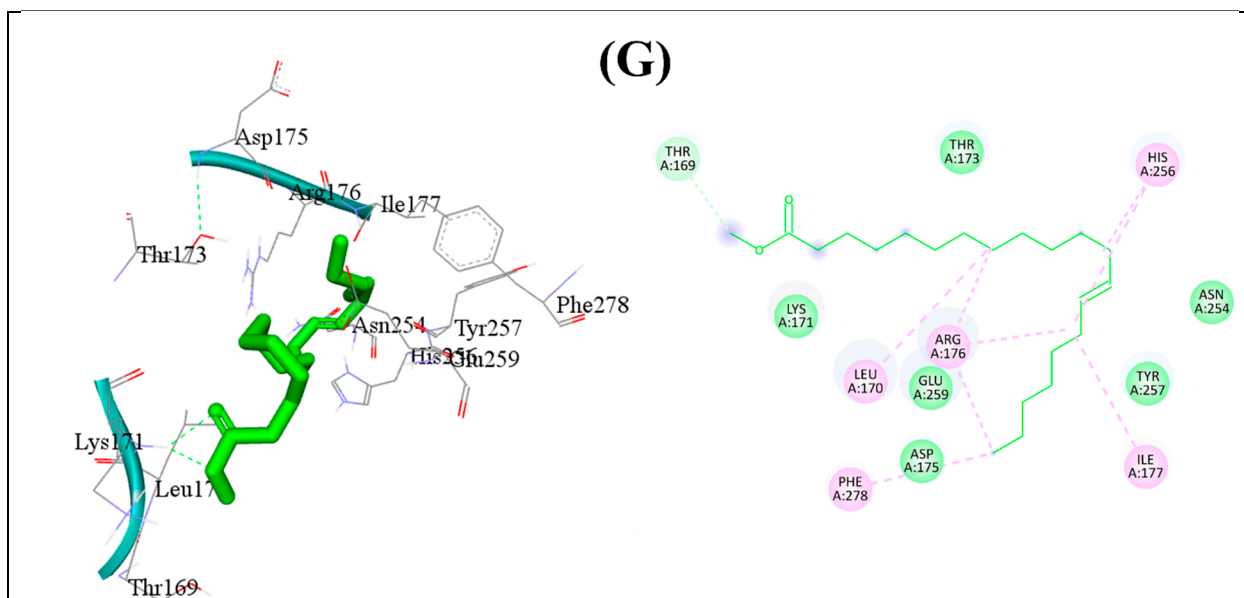

Figure S1 The putative 2D and 3D binding mode of all investigated compounds (A-G) using target protein 1R4U. Green dashes are indicating hydrogen bonding whereas red dashes are indicating hydrophobic interactions.

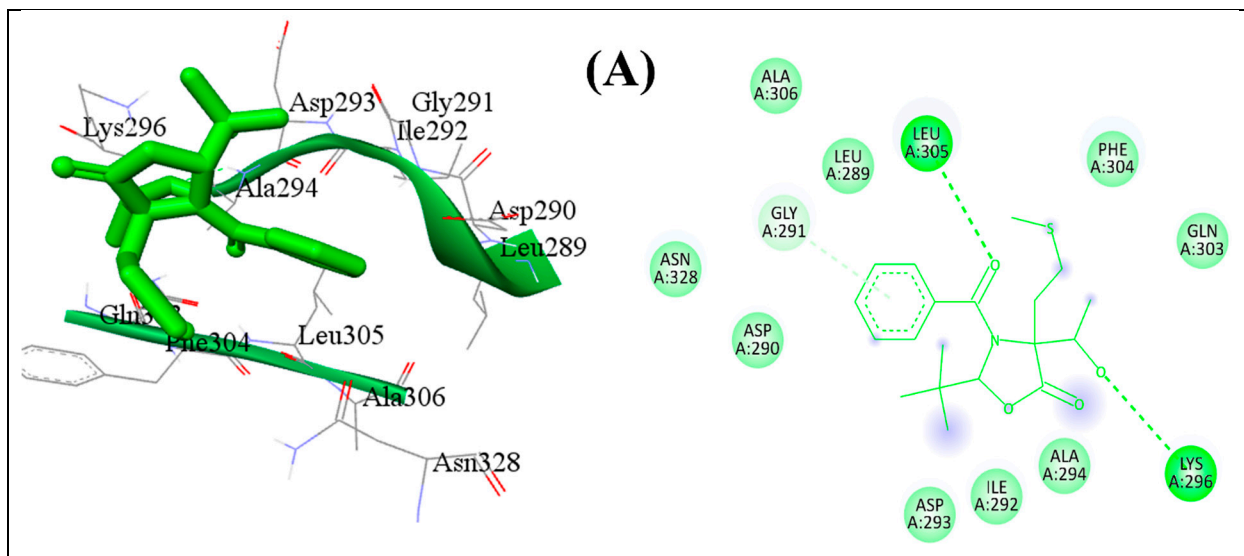

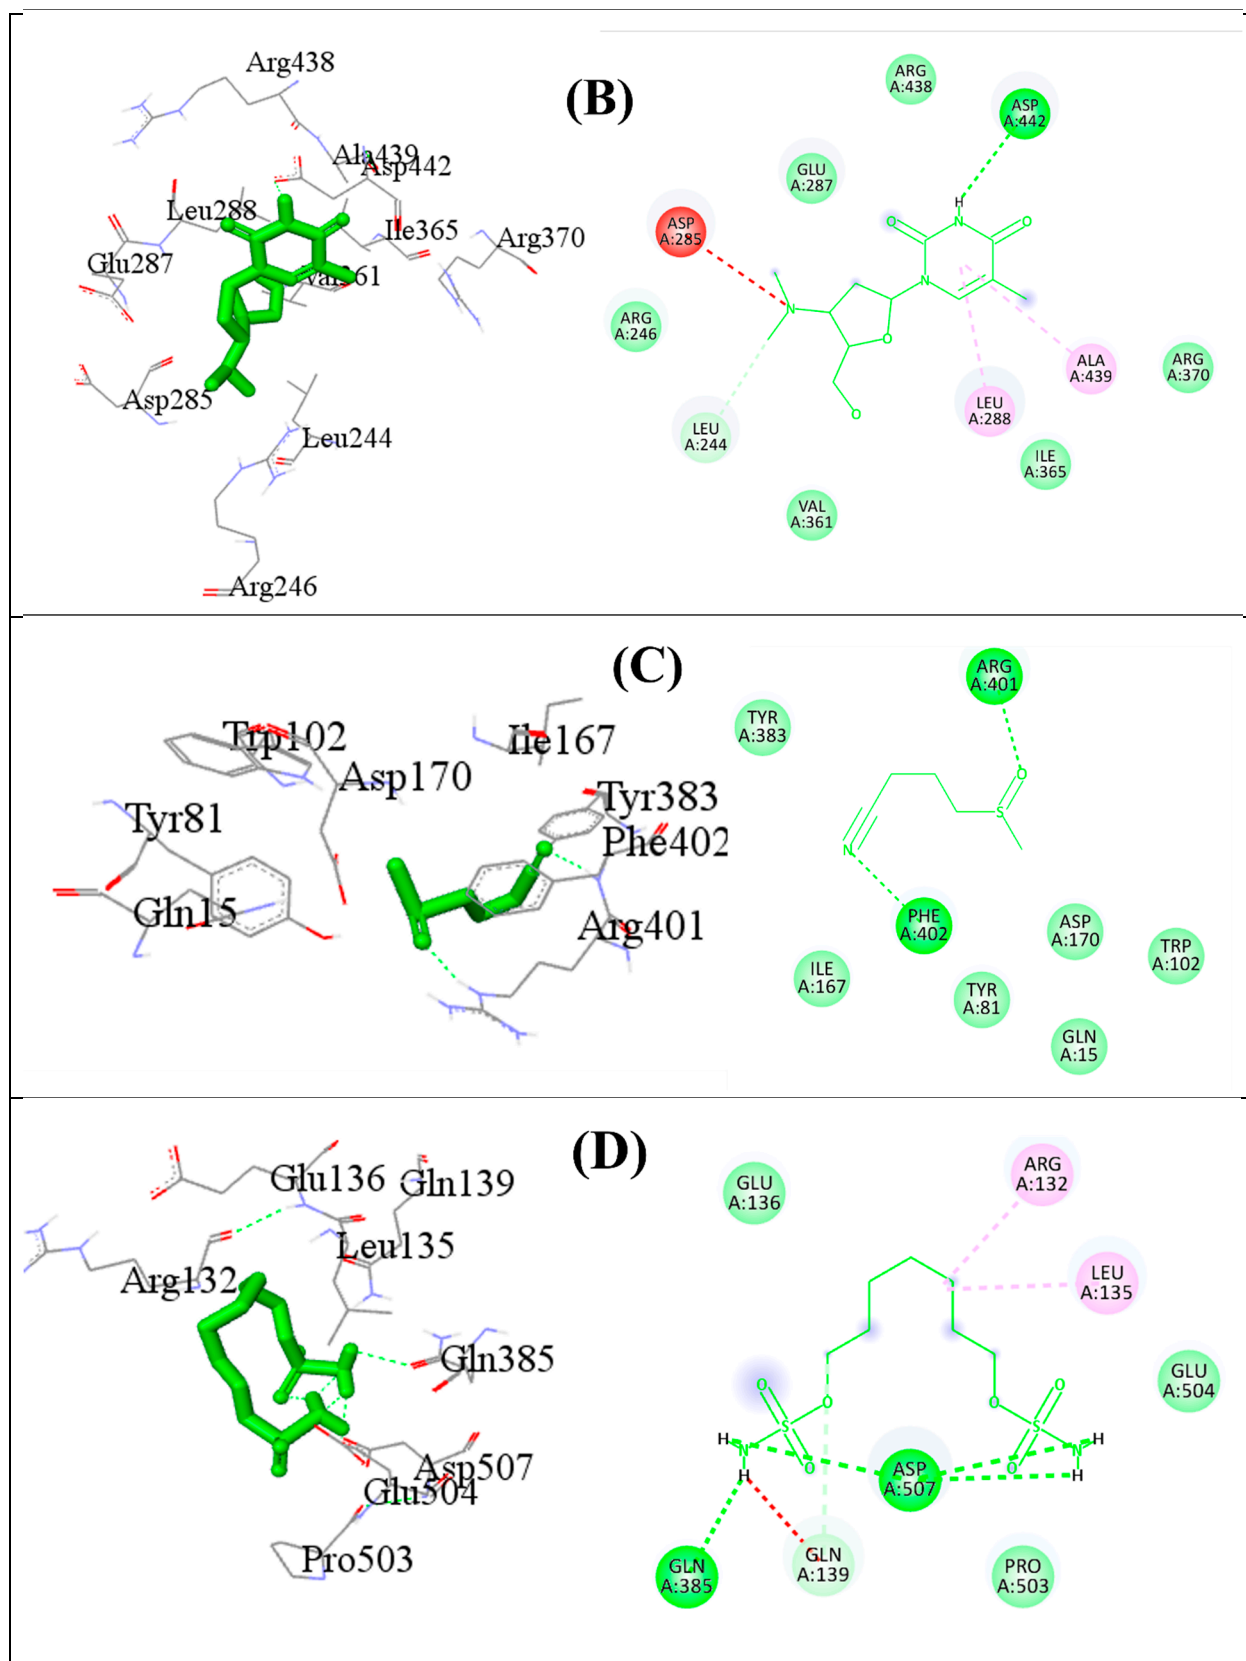

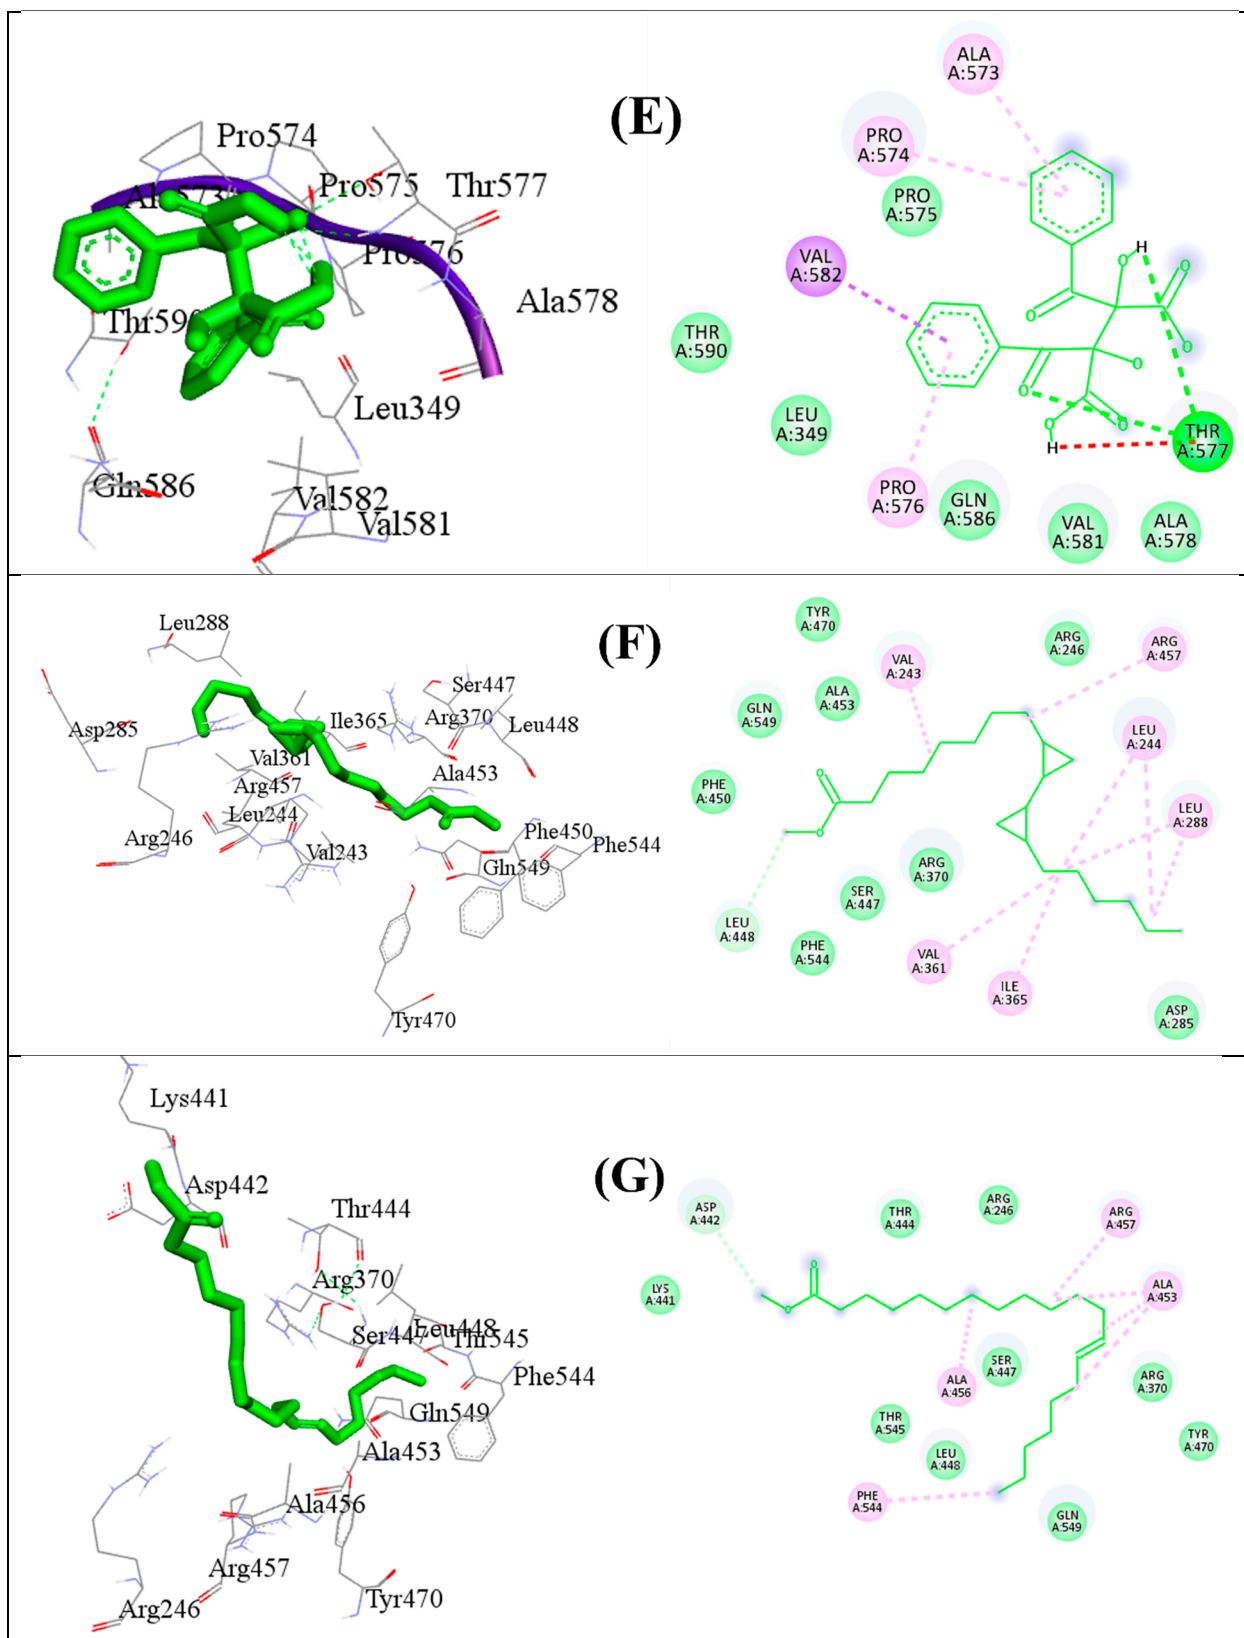

Figure S2 The putative 2D and 3D binding mode of *all investigated compounds (A-G)* using target protein 3O8Y. Green dashes are indicating hydrogen bonding whereas red dashes are indicating hydrophobic interactions.

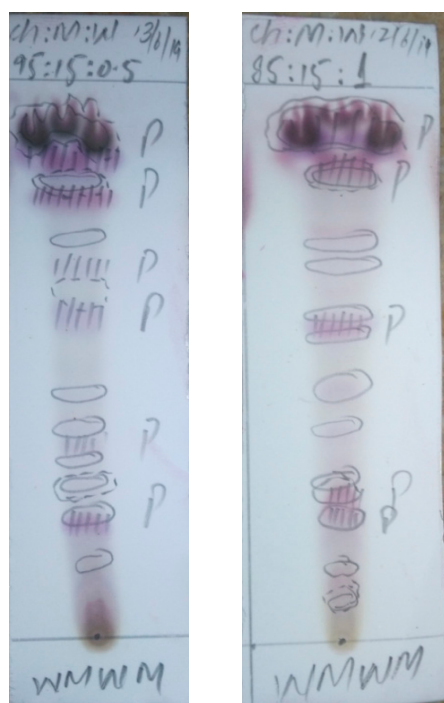

Figure S3 Thin layer chromatography results for studied compounds.
